# Supplementary material for: The Effect of Mobile App Interventions on Influencing Healthy Maternal Behavior and Improving Perinatal Health Outcomes: Systematic Review
Source: PubMed Central journal article supplement (PMC6107729; doi:10.2196/10012), 2018-08-09
Supplement: mhealth_v6i8e10012_app1.pdf [file mhealth_v6i8e10012_app1.pdf]

## Multimedia Appendix 1: Search terms and articles retrieved

| Database                                                       | Search terms                                                                                                                                                                                                                                                                                                                                                                                                                                                                                 | Articles retrieved | Search date | Notes                                                                                                                                                                                                                                                                                                                                                                                                                                                      |
|----------------------------------------------------------------|----------------------------------------------------------------------------------------------------------------------------------------------------------------------------------------------------------------------------------------------------------------------------------------------------------------------------------------------------------------------------------------------------------------------------------------------------------------------------------------------|--------------------|-------------|------------------------------------------------------------------------------------------------------------------------------------------------------------------------------------------------------------------------------------------------------------------------------------------------------------------------------------------------------------------------------------------------------------------------------------------------------------|
| PubMed                                                         | Search (((((((((((("mobile app*") OR "mobile phone") OR "cell phone") OR smartphone) OR iPhone) OR iPad) OR Android) OR "handheld computer") OR "mobile applications"[MeSH Terms]) OR "smartphone"[MeSH Terms]) OR "cell phones"[MeSH Terms]) OR "computers, handheld"[MeSH Terms])) AND (((((((((((pregnan*) OR pregnancy[MeSH Terms]) OR pregnant women[MeSH Terms]) OR matern*) OR mother*) OR prenat*) OR pre-nat) OR perinat*) OR peri-nat*) OR antenat*) OR ante-nat*) OR reproducti*) | 1007               | 15 Feb 2017 |                                                                                                                                                                                                                                                                                                                                                                                                                                                            |
| Embase                                                         | 'pregnan*' OR 'matern*' OR 'mother*' OR 'prenat*' OR 'pre-nat*' OR 'perinat*' OR 'peri-nat*' OR 'antenat*' OR 'ante-nat*' OR 'reproducti*' AND ('mobile app*' OR 'mobile application' OR 'mobile phone' OR 'cell phone' OR 'smartphone' OR 'iphone' OR 'ipad' OR 'android' OR 'personal digital assistant')                                                                                                                                                                                  | 1426               | 15 Feb 2017 | All fields searched (not just .ti, .ab)                                                                                                                                                                                                                                                                                                                                                                                                                    |
| Cochrane Library                                               | (pregnan* or matern* or mother* or prenat* or pre-nat* or perinat* or peri-nat* or antenat* or ante-nat* or reproducti*) and ("mobile app*" or "cell phone" or smartphone or iphone or ipad or android or handheld computer)                                                                                                                                                                                                                                                                 | 108                | 15 Feb 2017 |                                                                                                                                                                                                                                                                                                                                                                                                                                                            |
| CINAHL                                                         | TX ( pregnan* OR matern* OR mother* OR prenat* OR pre-nat* OR perinat* OR peri-nat* OR antenat* OR ante-nat* or reproducti* ) AND TX ( "mobile app" OR "mobile phone" OR "cell phone" OR smartphone OR iPhone OR iPad OR android OR handheld computer )                                                                                                                                                                                                                                      | 174                | 15 Feb 2017 | Of these, 100 were NOT already present in Medline.                                                                                                                                                                                                                                                                                                                                                                                                         |
| WHO Global Health Library                                      | tw:((pregnan* OR matern* OR mother* OR prenat* OR pre-nat* OR perinat* OR peri-nat* OR antenat* OR ante-nat* OR reproducti*) AND ("mobile app*" OR "mobile phone" OR "cell phone" OR smartphone OR iphone OR ipad OR android OR handheld)) AND (instance:"ghl")                                                                                                                                                                                                                              | 1697               | 15 Feb 2017 | WHO Global Health Library only allows for title, subject, abstract lookup, not “all fields” or “all text”. 1697 returned include 1652 from Medline (duplicates).                                                                                                                                                                                                                                                                                           |
| POPLINE                                                        | (( ( ( pregnan* OR matern* OR mother* OR prenat* OR pre-nat* OR perinat* OR peri-nat* OR antenat* OR ante-nat* OR reproducti* ) ) ) AND ( ( ( "mobile app*" OR "cell phone" OR smartphone OR iphone OR ipad OR android OR handheld computer ) ) ) ) AND ( ( Language:English ) )                                                                                                                                                                                                             | 674                | 15 Feb 2017 |                                                                                                                                                                                                                                                                                                                                                                                                                                                            |
| CABI Global Health                                             | (pregnan* or matern* or mother* or prenat* or pre-nat* or perinat* or peri-nat* or antenat* or ante-nat* or reproducti*) and (“mobile app*” or “cell phone” or smartphone or iphone or ipad or android or handheld computer)                                                                                                                                                                                                                                                                 | 3                  | 16 Feb 2017 | To be thorough, also did simple search for “pregnan*” and “mobile*”, resulting in 201 articles, no further of relevance.                                                                                                                                                                                                                                                                                                                                   |
| Handsearching (post-hoc) in JMIR Publications                  | (pregnan* OR perinat* OR antenat* OR prenat* OR matern* OR mother)                                                                                                                                                                                                                                                                                                                                                                                                                           | 143                | 5 Apr 2018  | Post-hoc handsearch in <i>JMIR</i> publications for dates up to 15 June 2017, with 143 articles returned. Two reviewers (LD & VF) screened for title/abstract and none were eligible: wrong design (56), wrong intervention (42), wrong population (45). Several articles had multiple reasons for exclusion, although each was allocated to a single category. In PRISMA diagram as “handsearching”.                                                      |
| Handsearching (post-hoc) reference lists of retrieved articles |                                                                                                                                                                                                                                                                                                                                                                                                                                                                                              | 948                | 6 May 2018  | Post-hoc handsearch of reference lists among 69 retrieved articles (full-text assessed for eligibility), with 778 articles assessed (after duplicates removed). Ti/ab screening performed by 2 reviewers (LD & VF); none were eligible: wrong design (197), wrong intervention (463), wrong population (118). Several articles had multiple reasons for exclusion, although each was allocated to a single category. In PRISMA diagram as “handsearching”. |
