# Supplementary material for: The Effect of Mobile App Interventions on Influencing Healthy Maternal Behavior and Improving Perinatal Health Outcomes: Systematic Review
Source: PubMed Central journal article supplement (PMC6107729; doi:10.2196/10012), 2018-08-09
Supplement: mhealth_v6i8e10012_app2.pdf [file mhealth_v6i8e10012_app2.pdf]

## Multimedia Appendix 2: Excluded studies

To assess eligibility, full-text of 69 articles was reviewed by 2 reviewers. The reason for exclusion was allocated to a single category as listed below, though several articles had multiple reasons for exclusion.

| Authors (publication year)                    | Reason for exclusion                                                                                    |
|-----------------------------------------------|---------------------------------------------------------------------------------------------------------|
| <b>Wrong study design (20)</b>                |                                                                                                         |
| Ashman, Collins et al. (2017)                 | No comparison arm. Intervention allows dietitian to view food photos to support paper dietary records.  |
| Bartholomew, Church et al. (2011)             | Crossover study design.                                                                                 |
| Bartholomew, Soules et al. (2015)             | Crossover study design.                                                                                 |
| Daly, Baum et al. (2016)                      | Survey results about app usage. No comparative arm.                                                     |
| Fowles and Gentry (2008)                      | Descriptive study design.                                                                               |
| Ganju, Krapf et al. (2016)                    | Compares intervention group ("low-risk") to general population statistics                               |
| García-Sáez, Martínez-Sarriegui et al. (2014) | Design evaluation of a prototype.                                                                       |
| Hirst, Farmer et al. (2015)                   | Service development project; not intended to influence maternal knowledge or behaviour.                 |
| Hirst, Loerup et al. (2016)                   | Service development project; not intended to influence maternal knowledge or behaviour.                 |
| Hirst, Mackillop et al. (2015)                | Service development project; not intended to influence maternal knowledge or behaviour.                 |
| Hirst, Mackillop et al. (2015)                | Cross-sectional study design.                                                                           |
| Knight-Agarwal, Davis et al. (2015)           | Describes app development using cross-sectional and qualitative methods.                                |
| Loerup, Gibson et al. (2014)                  | Pilot cohort observational study; not intended to influence maternal knowledge or behaviour.            |
| Loerup, Gibson et al. (2015)                  | Service development project; not intended to influence maternal knowledge or behaviour.                 |
| Loerup, Hirst et al. (2014)                   | Cross-sectional study design.                                                                           |
| Mackillop, Loerup et al. (2014)               | Describes development of an intervention.                                                               |
| Marko, Krapf et al. (2016)                    | Prospective observational study.                                                                        |
| Miles and Mynard (2013)                       | Describes development of an app. No user or comparison data.                                            |
| O'Brien, Cramp et al. (2016)                  | Mobile app interventions not specifically mentioned.                                                    |
| Tombor, Shahab et al. (2016)                  | About development of program.                                                                           |
| <b>Wrong intervention (20)</b>                |                                                                                                         |
| Arnold, Nguyen et al. (2013)                  | Not a mobile app intervention.                                                                          |
| Calle-Pascual, Pérez-Ferre et al. (2010)      | SMS intervention using software to transmit data.                                                       |
| Colaci, Chaudhri et al. (2016)                | No mobile app interventions for pregnant women mentioned.                                               |
| Davis, Wambach et al. (2014)                  | Not a mobile app intervention. SMS and PowerPoint presentation preloaded onto an iPad.                  |
| Fawsitt, Meaney et al. (2016)                 | Not a mobile app intervention. Survey of women's willingness to pay for a type of intervention.         |
| Graham, Uesugi et al. (2014)                  | Not a mobile app intervention.                                                                          |
| Kingston, McDonald et al. (2014)              | Not a mobile app intervention. Uses tablet for a screening questionnaire during a prenatal appointment. |
| Kirtley and Chien (2012)                      | Not a mobile app intervention. Overview of new research.                                                |
| Logsdon, Davis et al. (2015)                  | Not a mobile app intervention; streams YouTube on iPad while mothers are in hospital.                   |
| Marcano-Belisario, Gupta et al. (2016)        | Not a mobile app intervention; survey on a tablet computer.                                             |

| <b>Authors (publication year)</b>          | <b>Reason for exclusion</b>                                                                                                                                         |
|--------------------------------------------|---------------------------------------------------------------------------------------------------------------------------------------------------------------------|
| Marko, Ganju et al. (2016)                 | As described, purpose of intervention to connect device and transmit data, not to provide information to pregnant women, influence maternal knowledge or behaviour. |
| Matsubara (1985)                           | Not a mobile app intervention.                                                                                                                                      |
| Mauriello, Van Marter et al. (2016)        | Not a mobile app intervention; web-based clinical intervention using iPad at prenatal appointments.                                                                 |
| McLean, Osgood et al. (2017)               | Feasibility study of a data collection system.                                                                                                                      |
| Nau (2016)                                 | Not a mobile app intervention.                                                                                                                                      |
| Olson, Graham et al. (2013)                | Not a mobile app intervention.                                                                                                                                      |
| Peter, Barron et al. (2015)                | Not a mobile app intervention. About SMS.                                                                                                                           |
| Rotheram-Borus, Tomlinson et al. (2012)    | Not a mobile app intervention.                                                                                                                                      |
| Takeuchi and Horiuchi (2016)               | Not a mobile app intervention; website.                                                                                                                             |
| Wang and Kim (2015)                        | Not a mobile app intervention; website.                                                                                                                             |
| <b>Wrong population (5)</b>                |                                                                                                                                                                     |
| Cheng, Huang et al. (2016)                 | Target population are postpartum women.                                                                                                                             |
| Demirci and Bogen (2016)                   | Target population are postpartum women.                                                                                                                             |
| Maycock, Scott et al. (2015)               | Target population are male partners.                                                                                                                                |
| Ramallo-Farina, Garcia-Perez et al. (2015) | Pregnant women excluded from study.                                                                                                                                 |
| Suleman (2015)                             | Target population are community midwives.                                                                                                                           |
| <b>Wrong outcomes (2)</b>                  |                                                                                                                                                                     |
| Atkinson, Westeinde et al. (2016)          | Immunisation focus.                                                                                                                                                 |
| Burgess, Atkinson et al. (2016)            | Immunisation focus.                                                                                                                                                 |
| <b>No study data reported (18)</b>         |                                                                                                                                                                     |
| No named author (a) (2013)                 | Promotional piece about an app. No study presented.                                                                                                                 |
| No named author (b) (2013)                 | Promotional piece about an app. No study presented.                                                                                                                 |
| Agarwal and Labrique (2014)                | Does not describe specific intervention. Studies described on SMS interventions or data management.                                                                 |
| Choi, Fukuoka et al. (2013)                | No data reported. About development of program.                                                                                                                     |
| Daniels and Wedler (2015)                  | No studies reported. About pregnant womens' app use                                                                                                                 |
| Garnweidner-Holme, Borgen et al. (2015)    | No data reported. About app development for GDM.                                                                                                                    |
| Griffiths, Brown et al. (2016)             | Systematic review protocol.                                                                                                                                         |
| Kennelly, Ainscough et al. (2016)          | Study protocol.                                                                                                                                                     |
| Larsson (2014)                             | Commentary.                                                                                                                                                         |
| Mackillop, Bartlett et al. (2016)          | Study protocol.                                                                                                                                                     |
| Malloy (2015)                              | Commentary on radiation in utero, neurological effects                                                                                                              |
| Mathew, Nimbalkar et al. (2016)            | Journal club review                                                                                                                                                 |
| Mudey, Goyal et al. (2015)                 | No data reported. Type of intervention unclear.                                                                                                                     |
| Nguyen, Vu et al. (2015)                   | No data reported. HMIS project underway.                                                                                                                            |
| Schuster (2014)                            | Broadly describes mobile apps; not a mobile app intervention.                                                                                                       |
| Stabile (2015)                             | Could not access article.                                                                                                                                           |
| Stevenson, Wojcieszek et al. (2016)        | Describes development of an app. No data reported.                                                                                                                  |
| Zairina, Abramson et al. (2015)            | Study protocol.                                                                                                                                                     |

## **Reference list for excluded studies (65)**

(2013). "Best beginnings mobile apps: the transition to parenthood." Community Pract **86**(4): 11.

(2013). "bump buddy and baby buddy smartphone apps trialled." Nursing Children & Young People **25**(6): 5-5.

Agarwal, S. and A. Labrique (2014). "Newborn health on the line: the potential mHealth applications." Jama **312**(3): 229-230.

Arnold, C. W., T. Nguyen and C. Janzen (2013). "BabySTEPS: a sugar tracking electronic portal system for gestational diabetes." Stud Health Technol Inform **192**: 1123.

Ashman, A. M., C. E. Collins, L. J. Brown, K. M. Rae and M. E. Rollo (2017). "Validation of a Smartphone Image-Based Dietary Assessment Method for Pregnant Women." Nutrients **9**(1).

Atkinson, K. M., J. Westeinde, R. Ducharme, S. E. Wilson, S. L. Deeks, N. Crowcroft, S. Hawken and K. Wilson (2016). "Can mobile technologies improve on-time vaccination? A study piloting maternal use of ImmunizeCA, a Pan-Canadian immunization app." Human Vaccines and Immunotherapeutics **12**(10): 2654-2661.

Bartholomew, M. L., K. Church, G. Graham, J. Burlingame, I. Zalud, L. Sauvage, K. Soules and S. Shaha (2011). "Managing diabetes in pregnancy using cell phone/internet technology." American Journal of Obstetrics and Gynecology **204**(1): S113-S114.

Bartholomew, M. L., K. Soules, K. Church, S. Shaha, J. Burlingame, G. Graham, L. Sauvage and I. Zalud (2015). "Managing Diabetes in Pregnancy Using Cell Phone/Internet Technology." Clin Diabetes **33**(4): 169-174.

Burgess, K., K. M. Atkinson, J. Westeinde, N. Crowcroft, S. L. Deeks and K. Wilson (2016). "Barriers and facilitators to the use of an immunization application: a qualitative study supplemented with Google Analytics data." J Public Health (Oxf).

Calle-Pascual, A. L., N. Pérez-Ferre, M. Galindo, M. D. Fernández, V. Velasco, I. Runkle, M. J. De La Cruz, P. Martín Rojas-Marcos and L. Del Valle (2010). "The outcomes of gestational diabetes mellitus after a telecare approach are not inferior to traditional outpatient clinic visits." International Journal of Endocrinology **2010**.

Cheng, H. Y., T. Y. Huang, L. Y. Chien, Y. F. Cheng and F. J. Chen (2016). "[The Effects of a Mobile Application Social Support Program on Postpartum Perceived Stress and Depression]." Hu Li Za Zhi **63**(6): 52-60.

Choi, J., Y. Fukuoka and K. A. Lee (2013). "Development of a Mobile Phone-Based Physical Activity Program in Pregnant Women." Communicating Nursing Research **46**: 386-386.

Colaci, D., S. Chaudhri and A. Vasan (2016). "MHealth Interventions in Low-Income Countries to Address Maternal Health: A Systematic Review." Annals of Global Health.

Daly, H., A. Baum, J. Ritchie and M. Blair (2016). "Baby buddy app-a public health opportunity for new parents; evaluation of the first 46,000 downloads." Archives of Disease in Childhood **101**: A184-A185.

Daniels, M. and J. A. Wedler (2015). "Enhancing Childbirth Education through Technology." International Journal of Childbirth Education **30**(3): 28-32.

Davis, A. M., K. A. Wambach, E. L. Nelson, C. Odar, T. Lillis, A. McKinley and M. Gallagher (2014). "Health behavior change in pregnant women: a two-phase study." Telemed J E Health **20**(12): 1165-1169.

Demirci, J. R. and D. L. Bogen (2016). "Feasibility and acceptability of a mobile app in an ecological momentary assessment of early breastfeeding." Matern Child Nutr.

Fawsitt, C., S. Meaney and P. Corcoran (2016). "A cost-benefit analysis of a mobile application to monitor surgical wound post-caesarean section: A pilot-based, feasibility study." BJOG: An International Journal of Obstetrics and Gynaecology **123**: 55.

Fowles, E. R. and B. Gentry (2008). "The feasibility of personal digital assistants (PDAs) to collect dietary intake data in low-income pregnant women." J Nutr Educ Behav **40**(6): 374-377.

Ganju, N., J. Krapf, J. Benham and K. I. Marko (2016). "Preventing excessive gestational weight gain by using connected weight scales paired with mobile apps." Obstetrics and Gynecology **127**: 103S-104S.

García-Sáez, G., I. Martínez-Sarriegui, M. Rigla, B. Pons, M. Villaplana, E. J. Gómez and M. E. Hernando (2014). "Design evaluation of a prototype user interface to support a guideline-based decision support system in gestational diabetes." Diabetes Technology and Therapeutics **16**: A112.

Garnweidner-Holme, L. M., I. Borgen, I. Garitano, J. Noll and M. Lukasse (2015). "Designing and Developing a Mobile Smartphone Application for Women with Gestational Diabetes Mellitus Followed-Up at Diabetes Outpatient Clinics in Norway." Healthcare (Basel) **3**(2): 310-323.

Graham, M. L., K. H. Uesugi, J. Niederdeppe, G. K. Gay and C. M. Olson (2014). "The theory, development, and implementation of an e-intervention to prevent excessive gestational weight gain: e-Moms Roc." Telemed J E Health **20**(12): 1135-1142.

Griffiths, S. E., K. E. Brown, E. A. Fulton, I. Tombor and F. Naughton (2016). "Are digital interventions for smoking cessation in pregnancy effective? A systematic review protocol." Syst Rev **5**(1): 207.

Hirst, J. E., A. Farmer, L. Loerup, L. Mackillop, J. Levy, K. Bartlett, Y. Kenworthy, D. A. Kevat, C. Velardo and L. Tarassenko (2015). "The utility of digital blood glucose monitoring metrics to predict high birth weight in women with gestational diabetes." Diabetes **64**: A377-A378.

Hirst, J. E., L. Loerup, L. Mackillop, A. Farmer, Y. Kenworthy, K. Bartlett, C. Velardo, D. A. Kevat, L. Tarassenko and J. C. Levy (2016). "Digital blood glucose monitoring could provide new objective assessments of blood glucose control in women with gestational diabetes." Diabetic Medicine **33**(11): 1598-1599.

Hirst, J. E., L. Mackillop, L. Loerup, D. A. Kevat, K. Bartlett, O. Gibson, Y. Kenworthy, J. C. Levy, L. Tarassenko and A. Farmer (2015). "Acceptability and user satisfaction of a smartphone-based, interactive

blood glucose management system in women with gestational diabetes mellitus." J Diabetes Sci Technol **9**(1): 111-115.

Hirst, J. E., L. H. Mackillop, L. Loerup, A. J. Farmer, D. A. Kevat, K. J. Bartlett, O. J. Gibson, Y. M. Kenworthy, J. C. Levy and L. Tarassenko (2015). "GDm-health: Development of a real-time smartphone solution for the management of women with gestational diabetes mellitus (GDM)." BJOG: An International Journal of Obstetrics and Gynaecology **122**: 403.

Kennelly, M. A., K. Ainscough, K. Lindsay, E. Gibney, M. Mc Carthy and F. M. McAuliffe (2016). "Pregnancy, exercise and nutrition research study with smart phone app support (Pears): Study protocol of a randomized controlled trial." Contemp Clin Trials **46**: 92-99.

Kingston, D., S. McDonald, A. Biringer, M. P. Austin, K. Hegadoren, S. McDonald, R. Giallo, A. Ohinmaa, G. Lasiuk, G. MacQueen, W. Sword, M. Lane-Smith and S. V. van Zanten (2014). "Comparing the feasibility, acceptability, clinical-, and cost-effectiveness of mental health e-screening to paper-based screening on the detection of depression, anxiety, and psychosocial risk in pregnant women: a study protocol of a randomized, parallel-group, superiority trial." Trials **15**: 3.

Kirtley, S. and P. Chien (2012). "Women's health-what's new worldwide." BJOG: An International Journal of Obstetrics and Gynaecology **119**(3): 385-387.

Knight-Agarwal, C., D. L. Davis, L. Williams, R. Davey, R. Cox and A. Clarke (2015). "Development and Pilot Testing of the Eating4two Mobile Phone App to Monitor Gestational Weight Gain." JMIR Mhealth Uhealth **3**(2): e44.

Larsson, M. (2014). "Interventions during pregnancy and childbirth - Challenges and opportunities." Sexual and Reproductive Healthcare **5**(4): 159.

Loerup, L., O. J. Gibson, J. E. Hirst, A. J. Farmer, K. J. Bartlett, Y. M. Kenworthy, J. E. Blincowe, D. A. Kevat, L. H. MacKillop, L. Tarassenko and J. C. Levy (2014). "GDm-Health: A pilot study demonstrating the feasibility of mobile phone assisted treatment advice and medication adjustment for women with gestational diabetes." Diabetic Medicine **31**: 148-149.

Loerup, L., O. J. Gibson, J. E. Hirst, A. J. Farmer, K. J. Bartlett, Y. M. Kenworthy, D. A. Kevat, L. H. Mackillop, L. Tarassenko and J. C. Levy (2015). "A comparison of blood glucose metrics to assess the feasibility of a digital health system for management of women with gestational diabetes: The GDm-Health study." Diabetic Medicine **32**: 18-19.

Loerup, L., J. E. Hirst, L. H. MacKillop, A. Farmer, D. A. Kevat, L. Tarassenko, O. J. Gibson, K. Bartlett, Y. M. Kenworthy and J. Levy (2014). "GDm-Health: A pilot study examining acceptability of mobile phone assisted remote blood glucose monitoring for women with gestational diabetes." Diabetic Medicine **31**: 147.

Logsdon, M. C., D. Davis, D. Eckert, F. Smith, R. Stikes, J. Rushton, J. Myers, J. Capps and K. Sparks (2015). "Feasibility of Two Educational Methods for Teaching New Mothers: A Pilot Study." Interact J Med Res **4**(4): e20.

Mackillop, L., L. Loerup, K. Bartlett, A. Farmer, O. J. Gibson, J. E. Hirst, Y. Kenworthy, D. A. Kevat, J. C. Levy and L. Tarassenko (2014). "Development of a real-time smartphone solution for the management of women with or at high risk of gestational diabetes." J Diabetes Sci Technol **8**(6): 1105-1114.

Mackillop, L. H., K. Bartlett, J. Birks, A. J. Farmer, O. J. Gibson, D. A. Kevat, Y. Kenworthy, J. C. Levy, L. Loerup, L. Tarassenko, C. Velardo and J. E. Hirst (2016). "Trial protocol to compare the efficacy of a smartphone-based blood glucose management system with standard clinic care in the gestational diabetic population." BMJ Open **6**(3): e009702.

Malloy, M. E. (2015). "Babysafe Mode: Getting Smarter about Smart Technology and Pregnancy." Midwifery Today Int Midwife(116): 30-31.

Marcano-Belisario, J. S., A. K. Gupta, J. O'Donoghue, C. Morrison and J. Car (2016). "Tablet computers for implementing NICE antenatal mental health guidelines: protocol of a feasibility study." BMJ Open **6**(1): e009930.

Marko, K. I., N. Ganju, J. Brown, J. Benham and N. D. Gaba (2016). "Remote prenatal care monitoring with digital health tools can reduce visit frequency while improving satisfaction." Obstetrics and Gynecology **127**: 1S.

Marko, K. I., J. M. Krapf, A. C. Meltzer, J. Oh, N. Ganju, A. G. Martinez, S. G. Sheth and N. D. Gaba (2016). "Testing the Feasibility of Remote Patient Monitoring in Prenatal Care Using a Mobile App and Connected Devices: A Prospective Observational Trial." JMIR Res Protoc **5**(4): e200.

Mathew, J. L., S. M. Nimbalkar and V. Gopichandran (2016). "Efficacy of a mobile-based application on quality of care and perinatal mortality." Indian Pediatrics **53**(9): 823-828.

Matsubara, N. (1985). "[Studies on a handheld computer system for perinatal care]." Nihon Sanka Fujinka Gakkai Zasshi **37**(7): 1143-1150.

Mauriello, L. M., D. F. Van Marter, C. D. Umanson, P. H. Castle and E. L. de Aguiar (2016). "Using mHealth to Deliver Behavior Change Interventions Within Prenatal Care at Community Health Centers." Am J Health Promot **30**(7): 554-562.

Maycock, B. R., J. A. Scott, Y. L. Hauck, S. K. Burns, S. Robinson, R. Giglia, A. Jorgensen, B. White, A. Harries, S. Dhaliwal, P. A. Howat and C. W. Binns (2015). "A study to prolong breastfeeding duration: design and rationale of the Parent Infant Feeding Initiative (PIFI) randomised controlled trial." BMC Pregnancy Childbirth **15**: 159.

McLean, A., N. Osgood, J. Newstead-Angel, K. Stanley, D. Knowles, W. van der Kamp, W. Qian and R. Dyck (2017). "Building Research Capacity: Results of a Feasibility Study Using a Novel mHealth Epidemiological Data Collection System Within a Gestational Diabetes Population." Stud Health Technol Inform **234**: 228-232.

Miles, M. and P. Mynard (2013). "B is for Baby: The use of iPhone app technology in childbirth education." Women & Birth **26**: S34-35.

Mudey, A., R. Goyal, G. Dangre-Mudey and M. Khapre (2015). "Tracking of antenatal mothers and neonates in rural and remote area by mobile e-health model: An innovative approach." European Journal of Epidemiology **30**(8): 867.

Nau, J. Y. (2016). "[Not Available]." Rev Med Suisse **12**(518): 958-959.

Nguyen, L. T., N. Vu, H. V. Duong, J. O'Neil, D. Wiljer and C. K. Nguyen (2015). "mMOM - Improving maternal and child health for ethnic minority people in mountainous region of Thai Nguyen province of Vietnam through integration of mHealth in HMIS and user-provider interaction." Annals of Global Health **81**(1): 195-196.

O'Brien, C. M., C. Cramp and J. M. Dodd (2016). "Delivery of Dietary and Lifestyle Interventions in Pregnancy: is it Time to Promote the Use of Electronic and Mobile Health Technologies?" Semin Reprod Med **34**(2): e22-27.

Olson, C. M., M. L. Graham, M. M. Demment, D. Fernandez, J. Reschke and S. Groth (2013). "Pregnant women use an online healthy weight gain program as designed." FASEB Journal **27**.

Peter, J. E., P. Barron and Y. Pillay (2015). "Using mobile technology to improve maternal, child and youth health and treatment of HIV patients." S Afr Med J **106**(1): 3-4.

Ramallo-Farina, Y., L. Garcia-Perez, I. Castilla-Rodriguez, L. Perestelo-Perez, A. M. Wagner, P. de Pablos-Velasco, A. C. Dominguez, M. B. Cortes, L. Vallejo-Torres, M. E. Ramirez, P. P. Martin, I. Garcia-Puente, M. A. Salinero-Fort and P. G. Serrano-Aguilar (2015). "Effectiveness and cost-effectiveness of knowledge transfer and behavior modification interventions in type 2 diabetes mellitus patients--the INDICA study: a cluster randomized controlled trial." Implement Sci **10**: 47.

Rotheram-Borus, M. J., M. Tomlinson, D. Swendeman, A. Lee and E. Jones (2012). "Standardized functions for smartphone applications: examples from maternal and child health." Int J Telemed Appl **2012**: 973237.

Schuster, N. (2014). "Health apps: Mothered by smartphone." Pharmazeutische Zeitung(28).

Stabile, M. G. (2015). "The granting of the phone, that is a headstrong mother, a stubborn pediatrician." Medico e Bambino **34**(1): 50-51.

Stevenson, S. J., A. M. Wojcieszek, F. Boyle, S. Vlack, D. Ellwood, G. Gardener and V. Flenady (2016). "My baby's movements: developing mobile phone software to increase maternal awareness of fetal movements." Journal of Paediatrics and Child Health **52**: 17-18.

Suleman, Z. (2015). "Journey of a thousand miles: harnessing mobile communications technology to solve problems in maternal health and child mortality in Balochistan, Pakistan." IEEE Pulse **6**(1): 28-31.

Takeuchi, S. and S. Horiuchi (2016). "Randomised controlled trial using smartphone website vs leaflet to support antenatal perineal massage practice for pregnant women." Women Birth **29**(5): 430-435.

Tombor, I., L. Shahab, J. Brown, D. Crane, S. Michie and R. West (2016). "Development of SmokeFree Baby: a smoking cessation smartphone app for pregnant smokers." Transl Behav Med **6**(4): 533-545.

Wang, H. J. and I. O. Kim (2015). "[Effects of a Mobile Web-based Pregnancy Health Care Educational Program for Mothers at an Advanced Maternal Age]." J Korean Acad Nurs **45**(3): 337-346.

Zairina, E., M. J. Abramson, C. F. McDonald, J. Li, T. Dharmasiri, K. Stewart, S. P. Walker, E. Paul and J. George (2015). "Study protocol for a randomised controlled trial evaluating the efficacy of a telehealth program--management of asthma with supportive telehealth of respiratory function in pregnancy (MASTERY(c))." BMC Pulm Med **15**: 84.
