# Supplementary material for: The Effect of Mobile App Interventions on Influencing Healthy Maternal Behavior and Improving Perinatal Health Outcomes: Systematic Review
Source: PubMed Central journal article supplement (PMC6107729; doi:10.2196/10012), 2018-08-09
Supplement: mhealth_v6i8e10012_app3.pdf [file mhealth_v6i8e10012_app3.pdf]

### Multimedia Appendix 3: Bias assessment

| Bias                                                             | Study Author (Year) |                                                                                |             |                                                                                              |                |                                                                                                              |                |                                                                                                                 |
|------------------------------------------------------------------|---------------------|--------------------------------------------------------------------------------|-------------|----------------------------------------------------------------------------------------------|----------------|--------------------------------------------------------------------------------------------------------------|----------------|-----------------------------------------------------------------------------------------------------------------|
|                                                                  | Ainscough (2016)    |                                                                                | Choi (2016) |                                                                                              | Ledford (2016) |                                                                                                              | Zairina (2016) |                                                                                                                 |
|                                                                  | Risk                | Support                                                                        | Risk        | Support                                                                                      | Risk           | Support                                                                                                      | Risk           | Support                                                                                                         |
| <b>Random sequence generation (selection bias)</b>               | Unclear             | Not described.                                                                 | Low         | Computer-generated randomization, stratified by self-reported pre-pregnancy BMI category.    | Low            | Pre-assigned block randomisation (each block n=40).                                                          | Low            | Computer-generated allocation in a ratio of 1:1 for intervention or controls, in random blocks of four and six. |
| <b>Allocation concealment (selection bias)</b>                   | Unclear             | Not described.                                                                 | Low         | Allocation concealed in opaque envelopes.                                                    | Unclear        | Not described if those assigning participants to intervention groups were blinded.                           | Low            | Allocation concealed in opaque envelopes.                                                                       |
| <b>Blinding of participants and personnel (performance bias)</b> | High                | Participants not blinded to intervention. Unknown whether researchers blinded. | High        | Blinding participants and research staff was not possible due to nature of the intervention. | High           | Providers blinded to patient participation in study. Impossible to blind participants to intervention group. | High           | Blinding participants and research staff was not possible due to nature of the intervention.                    |
| <b>Blinding of outcome assessors (detection bias)</b>            | Unclear             | Not described.                                                                 | High        | Participants and researchers aware of group assignment.                                      | Unclear        | Data was analysed separately to data collection. Blinding not specified.                                     | Low            | Outcome assessments performed by research assistants masked to group allocation.                                |
| <b>Incomplete outcome data (attrition bias)</b>                  | Unclear             | Not described.                                                                 | Low         | Low dropout rate in intervention group; reasons not stated.                                  | Low            | No significant group differences detected. Reasons reported for attrition and exclusions.                    | Low            | Intervention had 3 withdrawals/loss to follow-up from 3 months. Controls had 1 withdrawal at 6-month follow-up. |
| <b>Selective reporting (reporting bias)</b>                      | Unclear             | Not fully described. Abstract reports on one primary outcome.                  | Low         | Authors reported results of primary and secondary outcomes.                                  | Low            | Authors reported outcomes of 3 primary hypotheses.                                                           | Low            | Authors reported results of primary and secondary outcomes.                                                     |
| <b>Other sources of bias</b>                                     | Unclear             | Not described.                                                                 | Unclear     | Not described.                                                                               | Unclear        | Not described.                                                                                               | Unclear        | Acknowledgements include in-kind support from Vitalograph Inc, manufacturers of COPD-6.                         |

| Study (publication year) | Random sequence generation | Allocation concealment | Blinding of participants & personnel | Blinding of outcome assessors | Incomplete outcome data | Selective reporting | Other bias |
|--------------------------|----------------------------|------------------------|--------------------------------------|-------------------------------|-------------------------|---------------------|------------|
|                          | <b>Risk assessment</b>     |                        |                                      |                               |                         |                     |            |
| Ainscough et al. (2016)  | Unclear                    | Unclear                | High                                 | Unclear                       | Unclear                 | Unclear             | Unclear    |
| Choi et al. (2016)       | Low                        | Low                    | High                                 | High                          | Low                     | Low                 | Unclear    |
| Ledford et al. (2016)    | Low                        | Unclear                | High                                 | Unclear                       | Low                     | Low                 | Unclear    |
| Zairina et al. (2016)    | Low                        | Low                    | High                                 | Low                           | Low                     | Low                 | Unclear    |
