# Supplementary material for: The Effect of Mobile App Interventions on Influencing Healthy Maternal Behavior and Improving Perinatal Health Outcomes: Systematic Review
Source: PubMed Central journal article supplement (PMC6107729; doi:10.2196/10012), 2018-08-09
Supplement: mhealth_v6i8e10012_app4.pdf [file mhealth_v6i8e10012_app4.pdf]

#### Multimedia Appendix 4: Intervention characteristics

| Study                                                                                                                                          | Ainscough<br>2016 | Zairina<br>2016 | Ledford<br>2016 | Choi<br>2016 |
|------------------------------------------------------------------------------------------------------------------------------------------------|-------------------|-----------------|-----------------|--------------|
| Participant risk category                                                                                                                      | Moderate          |                 | Low             |              |
| Domain                                                                                                                                         |                   |                 |                 |              |
| <b>User experience</b>                                                                                                                         |                   |                 |                 |              |
| User or “pilot” testing of app in design or development stage                                                                                  | -                 | -               | -               | Yes          |
| Links to shared participant “chat” spaces                                                                                                      | -                 | No              | No              | No           |
| <b>Content</b>                                                                                                                                 |                   |                 |                 |              |
| App developed specifically for the intervention                                                                                                | -                 | Yes             | Yes             | Yes          |
| App is publicly available                                                                                                                      | -                 | No              | No              | No           |
| Study cites stakeholder review for quality assurance                                                                                           | -                 | -               | -               | -            |
| Study cites evidence base for app content (e.g. references clinical practice guidelines, endorsed educational content, published manuals, etc) | -                 | Yes             | -               | Yes          |
| <b>Patient-provider communication</b>                                                                                                          |                   |                 |                 |              |
| Facilitation within the app by expert, clinician, other                                                                                        | -                 | No              | No              | No           |
| Healthcare provider access to user data for tracking purposes                                                                                  | -                 | Yes             | -               | No           |
| <b>Functionality</b>                                                                                                                           |                   |                 |                 |              |
| App connects to a device built in to phone                                                                                                     | No                | No              | No              | No           |
| App connects to a device through a “plug-in”                                                                                                   | No                | Yes             | No              | Yes          |
| “Push communication” feature where messages sent directly to user (e.g. reminders to use the app, fill in a survey)                            | -                 | Yes             | -               | Yes          |
| Study provides information comparing cost of app intervention with other communication modes                                                   | No                | No              | No              | No           |
| <b>Data tracking</b>                                                                                                                           |                   |                 |                 |              |
| Feature(s) for user to record own data                                                                                                         | -                 | Yes             | Yes             | Yes          |
| Feature(s) to automatically record user data                                                                                                   | -                 | Yes             | Yes             | Yes          |
| User access to data for tracking                                                                                                               | -                 | Yes             | Yes             | Yes          |
| App privacy policies or terms of use articulated                                                                                               | -                 | -               | -               | Yes          |

Notes: - Not reported.
