# Supplementary material for: The Effect of Mobile App Interventions on Influencing Healthy Maternal Behavior and Improving Perinatal Health Outcomes: Systematic Review
Source: PubMed Central journal article supplement (PMC6107729; doi:10.2196/10012), 2018-08-09
Supplement: mhealth_v6i8e10012_app5.pdf [file mhealth_v6i8e10012_app5.pdf]

### Multimedia Appendix 5: Inventories used in included studies

| Inventory                                                   | Range of scores                                                                                                                                      | Comment                                                                                                                                                                                                                                                                     | Study author |
|-------------------------------------------------------------|------------------------------------------------------------------------------------------------------------------------------------------------------|-----------------------------------------------------------------------------------------------------------------------------------------------------------------------------------------------------------------------------------------------------------------------------|--------------|
| Questionnaire developed from the Transtheoretical Model     | Stage-of-change score (1-5)                                                                                                                          | Assesses readiness to engage in new or change existing lifestyle behaviours.                                                                                                                                                                                                | Ainscough    |
| Stanford Brief Physical Activity Survey (SBAS)              | 5 response choices per item, including a global statement about the activity and the dimensions of frequency, intensity, time, and type of activity. | 2-item, self-report PA assessment tool designed to obtain a quick assessment of the usual amount and intensity of physical activity that a person currently performs throughout the day.                                                                                    | Choi         |
| Physical Activity Stages of Change                          | Scores motivational readiness for behaviour change (from pre-contemplation to maintenance stages)                                                    | 4-item questionnaire with Yes/No responses                                                                                                                                                                                                                                  | Choi         |
| Self-Efficacy for Physical Activity                         | 6 (low) to 30 (high)                                                                                                                                 | 5-item questionnaire measuring stages of change for exercise behaviour                                                                                                                                                                                                      | Choi         |
| Social Support and Exercise Survey                          | 13 (less) to 65 (more support)                                                                                                                       | 13-item questionnaire, each with 5-point scale, listing things people might do or say to someone who is trying to exercise regularly.                                                                                                                                       | Choi         |
| Barriers to Being Active Quiz (CDC)                         | 0 (low) to 9 (high)                                                                                                                                  | 21-item questionnaire on 4-point scale. Barriers to physical activity fall into 1 or more of 7 categories: lack of time, social influences, lack of energy, lack of willpower, fear of injury, lack of skill, and lack of resources.                                        | Choi         |
| Center for Epidemiological Studies Depression Scale (CES-D) | 0 (no) to 60 (severe depression)                                                                                                                     | 20-item questionnaire with 4 response categories, asking respondents how they may have felt or behaved.                                                                                                                                                                     | Choi         |
| Pregnancy Discomfort Checklist (modified)                   | Frequency, Severity: 32 (less) to 128 (more). Distress: 0 (less) to 128 (more)                                                                       | Assessed the severity and “distressfulness” of symptoms in addition to frequency, sleep disturbance and restless legs syndrome.                                                                                                                                             | Choi         |
| Patient activation measure (PAM)                            | 0=not activated, 100=most activated                                                                                                                  | 13 Likert-type items to create a continuous patient activation measure. Done at baseline and 32 wk gestation appt.                                                                                                                                                          | Ledford      |
| Prenatal Interpersonal Processes of Care (PIPC) scale       | Scale of 0-100. Items averaged to create subscales. Subscales averaged to calculate overall PIPC score.                                              | 30 items, each with 7-point scale. PIPC is conceptualized as the social and psychological aspects of provider interactions with patients. Focuses on 3 dimensions: Communication, Patient-Centered Decision Making, and Interpersonal Style.                                | Ledford      |
| Asthma Control Questionnaire (ACQ-7)                        | ACQ score is the mean of the 7 items, 0 (well controlled) and 6 (extremely poorly controlled).                                                       | 7-item questionnaire, each with 7-point scale. Given at 3- and 6-months for primary outcome measures. Can be completed in the clinic without daily recordings of symptoms, medication use and airway calibre. Patients recall their experiences during the previous 7 days. | Zairina      |
| Juniper’s mini-Asthma Quality-of-life Questionnaire (mAQLQ) | Score is the mean of all responses.                                                                                                                  | 15-item questionnaire, each with 7-point scale. Self-administered, with patients asked to recall their experiences during the previous 2 weeks. Measures 4 domains of symptoms, activity limitation, emotional function and environmental stimuli.                          | Zairina      |

**References:**

Ainscough K, Kennelly M, Lindsay KL, O'Sullivan EJ, McAuliffe FM: Impact of an mHealth supported healthy lifestyle intervention on behavioural stage of change in overweight and obese pregnancy. *Proceedings of the Nutrition Society* 2016, 75.

Choi J, Lee JH, Vittinghoff E, Fukuoka Y: mHealth Physical Activity Intervention: A Randomized Pilot Study in Physically Inactive Pregnant Women. *Matern Child Health J* 2016, 20:1091-1101.

Ledford CJ, Canzona MR, Cafferty LA, Hodge JA: Mobile application as a prenatal education and engagement tool: A randomized controlled pilot. *Patient Educ Couns* 2016, 99:578-582.

Zairina E, Abramson MJ, McDonald CF, Li J, Dharmasiri T, Stewart K, Walker SP, Paul E, George J: Telehealth to improve asthma control in pregnancy: A randomized controlled trial. *Respirology* 2016, 21:867-874.
