# Supplementary material for: The Effect of Mobile App Interventions on Influencing Healthy Maternal Behavior and Improving Perinatal Health Outcomes: Systematic Review
Source: PubMed Central journal article supplement (PMC6107729; doi:10.2196/10012), 2018-08-09
Supplement: mhealth_v6i8e10012_app6.pdf [file mhealth_v6i8e10012_app6.pdf]

## Multimedia Appendix 6: Secondary outcomes

Two of the four trials reported secondary outcomes relevant to this review, with data provided below.

| Outcomes                                                                                                                                  | N  | Intervention | N  | Controls     | P-value (where reported) |
|-------------------------------------------------------------------------------------------------------------------------------------------|----|--------------|----|--------------|--------------------------|
| <b>Zairina et al. (2016)</b>                                                                                                              |    |              |    |              |                          |
| <b>Major adverse maternal outcome (composite of death, admission to intensive care unit or near-miss mortality as defined by WHO)</b>     |    |              |    |              |                          |
| Postpartum haemorrhage                                                                                                                    | 33 | 1 (3%)       | 36 | 2 (6%)       | NR                       |
| “Hypertensive disorders of pregnancy”                                                                                                     | 33 | 2 (6%)       | 36 | 2 (6%)       | NR                       |
| Gestational diabetes mellitus                                                                                                             | 33 | 3 (9%)       | 36 | 6 (17%)      | NR                       |
| Elective caesarean birth                                                                                                                  | 33 | 6 (18%)      | 36 | 6 (17%)      | NR                       |
| Emergency caesarean birth                                                                                                                 | 33 | 4 (12%)      | 36 | 6 (17%)      | NR                       |
| <b>Maternal general health (as defined by standardised measures such as general health questionnaires)</b>                                |    |              |    |              |                          |
| FEV <sub>1</sub> – 6 months from baseline                                                                                                 | 33 | 0.11 ± 0.06  | 36 | 0.07 ± 0.05  | 0.57 <sup>a</sup>        |
| FEV <sub>1</sub> /FEV <sub>6</sub> – 6 months from baseline                                                                               | 33 | 1.53 ± 1.07  | 36 | -0.56 ± 0.98 | 0.16 <sup>a</sup>        |
| Prescribed an oral corticosteroid                                                                                                         | 33 | 1 user       | 36 | 2 users      |                          |
| <b>Maternal psychosocial outcomes, such as satisfaction, self-efficacy or anxiety (as measured by any validated, standard instrument)</b> |    |              |    |              |                          |
| mAQLQ – 6 months from baseline <sup>e</sup>                                                                                               | 33 | 0.51 ± 0.16  | 36 | -0.22 ± 0.15 | 0.002 <sup>b,c</sup>     |
| <b>Health service utilisation (antenatal care attendance, maternal antenatal admission, length of hospital stay of mother or infant)</b>  |    |              |    |              |                          |
| Unscheduled health visit related to asthma                                                                                                | 33 | 0 user       | 36 | 1 users      |                          |
| <b>Choi et al. (2016)</b>                                                                                                                 |    |              |    |              |                          |
| <b>Maternal general health (as defined by standardised measures such as general health questionnaires)</b>                                |    |              |    |              |                          |
| <b>Pregnancy symptoms: severity<sup>f</sup></b>                                                                                           | 13 | 48.6±8.1     | 14 | 55.3±11.4    | 0.10 <sup>d</sup>        |
| <b>Pregnancy symptoms: frequency<sup>f</sup></b>                                                                                          | 13 | 67.1±13.7    | 15 | 73.7±13.7    | 0.17 <sup>d</sup>        |
| <b>Pregnancy symptoms: distress<sup>g</sup></b>                                                                                           | 13 | 70.0±17.6    | 14 | 73.4±17.7    | 0.91 <sup>d</sup>        |
| <b>Maternal psychosocial outcomes, such as satisfaction, self-efficacy or anxiety (as measured by any validated, standard instrument)</b> |    |              |    |              |                          |
| <b>Over the 12 weeks of follow-up, the intervention reduced perceived barriers to exercise including<sup>h</sup>:</b>                     |    |              |    |              |                          |
| Lack of time                                                                                                                              | 13 | 3.08±2.25    | 15 | 4.13±2.26    | 0.08 <sup>d</sup>        |
| Social influence                                                                                                                          | 13 | 2.23±2.49    | 15 | 2.73±1.34    | 0.21 <sup>d</sup>        |
| Lack of energy                                                                                                                            | 13 | 3.62 ±2.90   | 15 | 4.80±2.08    | 0.02 <sup>c,d</sup>      |

|                                                   |    |           |    |           |                   |
|---------------------------------------------------|----|-----------|----|-----------|-------------------|
| Lack of willpower                                 | 13 | 3.23±2.13 | 15 | 5.20±2.01 | 0.06 <sup>d</sup> |
| Fear of injury                                    | 13 | 0.77±2.24 | 15 | 0.60±0.99 | 0.65 <sup>d</sup> |
| Lack of skill                                     | 13 | 1.15±1.99 | 15 | 1.33±1.40 | 0.70 <sup>d</sup> |
| Lack of resources                                 | 13 | 2.38±1.90 | 15 | 2.20±1.86 | 0.43 <sup>d</sup> |
| <b>Self-efficacy at 12 weeks<sup>i</sup></b>      | 13 | 18.7±4.4  | 15 | 17.1±5.2  | 0.58 <sup>d</sup> |
| <b>Depression (CES-D) at 12 weeks<sup>j</sup></b> | 13 | 8.8±2.7   | 15 | 11.1±6.9  | 0.56 <sup>d</sup> |

Notes: Unless otherwise noted, values reported for intervention and controls groups are presented as mean ± standard error. <sup>a</sup>*P*-value of difference between groups, adjusted for baseline. <sup>b</sup>*P*-value of difference between groups adjusted for baseline. <sup>c</sup>Statistically significant. <sup>d</sup>Overall *P*-values based on ANCOVA models for changes from baseline to 12-week visit, adjusting for baseline. <sup>e</sup>Increased mAQLQ score suggests better asthma-related quality of life. <sup>f</sup>Possible scores from 32 (less) to 128 (more). <sup>g</sup>Possible scores from 0 (less) to 128 (more). <sup>h</sup>Possible scores from 0 (low) to 9 (high). <sup>i</sup>Possible scores from 6 (low) to 30 (high self-efficacy). <sup>j</sup>Possible scores from 0 (no) to 60 (severe depression). QoL improved from baseline. FEV<sub>1</sub>=forced expiratory volume in 1 second. FEV<sub>6</sub>=forced expiratory volume in 6 seconds. mAQLQ= Mini-Asthma quality of life questionnaire. N=number within sample reporting. NR=Not reported. QoL=quality of life. WHO=World Health Organization.

### **References:**

Zairina E, Abramson MJ, McDonald CF, Li J, Dharmasiri T, Stewart K, et al. Telehealth to improve asthma control in pregnancy: A randomized controlled trial. *Respirology*. 2016 Jul;21(5):867-74. PubMed PMID: 27037722.

Choi J, Lee JH, Vittinghoff E, Fukuoka Y. mHealth Physical Activity Intervention: A Randomized Pilot Study in Physically Inactive Pregnant Women. *Maternal and child health journal*. 2016 May;20(5):1091-101. PubMed PMID: 26649879.
